# Supplementary material
Source: PubMed Central journal article supplement (PMC2735238)
Supplement: NIHMS116656-supplement-1.pdf [file NIHMS116656-supplement-1.pdf]

**Supplementary table 1. Private set of genes regulated in lungs of FVB and macIL-10<sup>tg</sup> before and after infection with *Mtb*<sup>a</sup>**

| Probe set no. | Gene symbol     | 0    |                        | 25   |                        | 42   |                        | max-min <sub>50</sub> ,<br>max/min <sub>2</sub> ,<br>q geno 0.05<br>(order) | Subcluster |
|---------------|-----------------|------|------------------------|------|------------------------|------|------------------------|-----------------------------------------------------------------------------|------------|
|               |                 | FVB  | macIL-10 <sup>tg</sup> | FVB  | macIL-10 <sup>tg</sup> | FVB  | macIL-10 <sup>tg</sup> |                                                                             |            |
| 1419720_at    | Gp9             | 74   | 128                    | 51   | 119                    | 45   | 67                     | 1                                                                           | A          |
| 1422977_at    | Gp1bb           | 75   | 204                    | 36   | 167                    | 19   | 73                     | 2                                                                           | A          |
| 1418480_at    | Cxcl7           | 639  | 1490                   | 361  | 1483                   | 151  | 512                    | 3                                                                           | A          |
| 1448995_at    | Cxcl4           | 595  | 1034                   | 413  | 1073                   | 340  | 561                    | 4                                                                           | A          |
| 1425784_a_at  | Olfm1           | 283  | 363                    | 260  | 390                    | 193  | 302                    | 5                                                                           | A          |
| 1422352_at    | Mcpt1           | 10   | 79                     | 7    | 84                     | 8    | 55                     | 6                                                                           | A          |
| 1424832_at    | 4732429D16Rik   | 121  | 262                    | 124  | 234                    | 111  | 151                    | 7                                                                           | A          |
| 1426175_a_at  | Mcpt7           | 17   | 66                     | 19   | 75                     | 17   | 33                     | 8                                                                           | A          |
| 1421734_at    | Ii8rb           | 100  | 197                    | 73   | 83                     | 71   | 157                    | 9                                                                           | A          |
| 1422868_s_at  | Gda             | 49   | 147                    | 28   | 74                     | 30   | 74                     | 10                                                                          | A          |
| 1421694_a_at  | Cspg2           | 37   | 422                    | 22   | 70                     | 17   | 93                     | 11                                                                          | A          |
| 1427256_at    | Cspg2           | 47   | 365                    | 29   | 103                    | 17   | 72                     | 12                                                                          | A          |
| 1418809_at    | Pira1           | 31   | 161                    | 36   | 110                    | 31   | 129                    | 13                                                                          | A          |
| 1450291_s_at  | Ms4a4c          | 75   | 807                    | 244  | 419                    | 238  | 478                    | 14                                                                          | A          |
| 1417758_at    | Itga2b          | 141  | 185                    | 74   | 117                    | 66   | 92                     | 15                                                                          | A          |
| 1422699_at    | Alox12          | 65   | 114                    | 26   | 59                     | 26   | 49                     | 16                                                                          | A          |
| 1426604_at    | Rnasel          | 128  | 189                    | 88   | 121                    | 90   | 120                    | 17                                                                          | A          |
| 1423805_at    | Dab2            | 184  | 208                    | 77   | 182                    | 89   | 156                    | 18                                                                          | A          |
| 1449254_at    | Spp1            | 3281 | 3751                   | 1462 | 3153                   | 1775 | 3672                   | 19                                                                          | A          |
| 1425503_at    | Gcnt2           | 493  | 507                    | 193  | 324                    | 167  | 440                    | 20                                                                          | A          |
| 1427630_x_at  | Ceacam1         | 307  | 336                    | 194  | 189                    | 164  | 318                    | 21                                                                          | A          |
| 1422123_s_at  | Ceacam1/Ceacam2 | 518  | 590                    | 323  | 319                    | 279  | 496                    | 22                                                                          | A          |
| 1450494_x_at  | Ceacam1         | 350  | 386                    | 207  | 200                    | 170  | 327                    | 23                                                                          | A          |
| 1425538_x_at  | Ceacam1         | 446  | 469                    | 248  | 236                    | 218  | 504                    | 24                                                                          | A          |
| 1452532_x_at  | Ceacam1         | 95   | 119                    | 67   | 66                     | 56   | 123                    | 25                                                                          | A          |
| 1419599_s_at  | Ms4a11          | 220  | 1375                   | 660  | 1121                   | 628  | 1551                   | 26                                                                          | B          |
| 1422013_at    | Clec4a2         | 97   | 375                    | 184  | 371                    | 193  | 375                    | 27                                                                          | B          |
| 1424302_at    | Pirb            | 95   | 434                    | 168  | 430                    | 156  | 484                    | 28                                                                          | B          |
| 1419494_a_at  | Tpd52           | 387  | 819                    | 572  | 864                    | 573  | 1124                   | 29                                                                          | B          |
| 1419598_at    | Ms4a6d          | 75   | 540                    | 279  | 524                    | 289  | 718                    | 30                                                                          | B          |

| Probe set no. | Gene name                   | 0   |                        | 25   |                        | 42   |                        | max-min <sub>50</sub> ,<br>max/min <sub>2</sub> ,<br>q geno 0.05<br>(order) | Subcluster |
|---------------|-----------------------------|-----|------------------------|------|------------------------|------|------------------------|-----------------------------------------------------------------------------|------------|
|               |                             | FVB | macIL-10 <sup>tg</sup> | FVB  | macIL-10 <sup>tg</sup> | FVB  | macIL-10 <sup>tg</sup> |                                                                             |            |
| 1420394_s_at  | <b>Gp49a/Lilrb4</b>         | 864 | 2286                   | 1355 | 2012                   | 1444 | 3622                   | 31                                                                          | B          |
| 1425065_at    | <b>Oas2</b>                 | 54  | 187                    | 163  | 186                    | 126  | 296                    | 32                                                                          | B          |
| 1460283_at    | <b>Mefv</b>                 | 39  | 172                    | 116  | 145                    | 92   | 236                    | 33                                                                          | B          |
| 1419282_at    | <b>Ccl12</b>                | 24  | 111                    | 165  | 720                    | 250  | 576                    | 34                                                                          | B          |
| 1419483_at    | <b>C3ar1</b>                | 33  | 67                     | 54   | 237                    | 67   | 194                    | 35                                                                          | B          |
| 1419482_at    | <b>C3ar1</b>                | 29  | 76                     | 118  | 356                    | 135  | 363                    | 36                                                                          | B          |
| 1424727_at    | <b>Ccr5</b>                 | 52  | 327                    | 317  | 894                    | 365  | 919                    | 37                                                                          | B          |
| 1419684_at    | <b>Ccl8</b>                 | 74  | 1628                   | 2017 | 4704                   | 2388 | 3991                   | 38                                                                          | B          |
| 1452067_at    | <b>Asahl</b>                | 413 | 730                    | 801  | 1247                   | 764  | 1081                   | 39                                                                          | B          |
| 1452068_at    | <b>Asahl</b>                | 177 | 232                    | 261  | 392                    | 234  | 352                    | 40                                                                          | B          |
| 1424265_at    | <b>Npl</b>                  | 193 | 436                    | 326  | 874                    | 435  | 1049                   | 41                                                                          | B          |
| 1425133_s_at  | <b>Rab3il1</b>              | 44  | 73                     | 66   | 120                    | 69   | 147                    | 42                                                                          | B          |
| 1448558_a_at  | <b>Pla2g4a</b>              | 166 | 214                    | 218  | 329                    | 202  | 359                    | 43                                                                          | B          |
| 1415871_at    | <b>Tgfbi</b>                | 367 | 1353                   | 1129 | 1775                   | 910  | 2741                   | 44                                                                          | B          |
| 1417876_at    | <b>Fcgr1</b>                | 44  | 313                    | 278  | 476                    | 242  | 783                    | 45                                                                          | B          |
| 1419526_at    | <b>Fgr</b>                  | 78  | 164                    | 150  | 227                    | 152  | 302                    | 46                                                                          | B          |
| 1448123_s_at  | <b>Tgfbi</b>                | 734 | 2577                   | 2082 | 3006                   | 1669 | 4344                   | 47                                                                          | B          |
| 1437463_x_at  | <b>Tgfbi</b>                | 298 | 863                    | 744  | 1065                   | 692  | 1500                   | 48                                                                          | B          |
| 1456250_x_at  | <b>Tgfbi</b>                | 448 | 1409                   | 1187 | 1744                   | 1059 | 2501                   | 49                                                                          | B          |
| 1448061_at    | <b>Msr1</b>                 | 56  | 297                    | 183  | 370                    | 217  | 530                    | 50                                                                          | B          |
| 1451716_at    | <b>Mafb</b>                 | 59  | 191                    | 108  | 242                    | 145  | 336                    | 51                                                                          | B          |
| 1426120_a_at  | <b>Cd244</b>                | 50  | 87                     | 76   | 123                    | 54   | 110                    | 52                                                                          | B          |
| 1449991_at    | <b>Cd244</b>                | 23  | 59                     | 26   | 82                     | 18   | 83                     | 53                                                                          | B          |
| 1455106_a_at  | <b>Ckb</b>                  | 216 | 178                    | 185  | 271                    | 141  | 285                    | 54                                                                          | B          |
| 1417172_at    | <b>Ube2l6</b>               | 65  | 125                    | 167  | 166                    | 163  | 267                    | 55                                                                          | B          |
| 1418133_at    | <b>Bcl3</b>                 | 93  | 150                    | 235  | 227                    | 205  | 383                    | 56                                                                          | B          |
| 1418718_at    | <b>Cxcl16</b>               | 385 | 514                    | 1381 | 1323                   | 1384 | 2408                   | 57                                                                          | B          |
| 1449195_s_at  | <b>Cxcl16</b>               | 214 | 299                    | 759  | 745                    | 731  | 1484                   | 58                                                                          | B          |
| 1419209_at    | <b>Cxcl1</b>                | 23  | 63                     | 286  | 271                    | 317  | 768                    | 59                                                                          | B          |
| 1438855_x_at  | <b>Tnfaip2</b>              | 363 | 541                    | 1576 | 1263                   | 1695 | 3533                   | 60                                                                          | B          |
| 1435872_at    | ---                         | 210 | 281                    | 422  | 390                    | 465  | 742                    | 61                                                                          | B          |
| 1417916_a_at  | <b>Fxc1 / 8030491N06Rik</b> | 626 | 795                    | 1005 | 1064                   | 1024 | 1491                   | 62                                                                          | B          |

| Probe set no. | Gene name            | 0    |                        | 25   |                        | 42   |                        | max-min <sub>50</sub> ,<br>max/min <sub>2</sub> ,<br>q geno 0.05<br>(order) | Subcluster |
|---------------|----------------------|------|------------------------|------|------------------------|------|------------------------|-----------------------------------------------------------------------------|------------|
|               |                      | FVB  | macIL-10 <sup>tg</sup> | FVB  | macIL-10 <sup>tg</sup> | FVB  | macIL-10 <sup>tg</sup> |                                                                             |            |
| 1454771_at    | ---                  | 47   | 81                     | 107  | 124                    | 121  | 183                    | 63                                                                          | B          |
| 1428572_at    | <b>Basp1</b>         | 234  | 343                    | 925  | 1260                   | 1126 | 2276                   | 64                                                                          | B          |
| 1435335_a_at  | <b>MGC79224</b>      | 162  | 202                    | 267  | 301                    | 338  | 469                    | 65                                                                          | B          |
| 1421947_at    | <b>Gng12</b>         | 225  | 296                    | 353  | 334                    | 405  | 802                    | 66                                                                          | B          |
| 1449363_at    | <b>Atf3</b>          | 74   | 132                    | 255  | 204                    | 225  | 568                    | 67                                                                          | B          |
| 1419725_at    | <b>Slc26a4</b>       | 32   | 37                     | 242  | 259                    | 235  | 690                    | 68                                                                          | B          |
| 1436416_x_at  | <b>Fxc1</b>          | 349  | 418                    | 479  | 501                    | 490  | 743                    | 69                                                                          | B          |
| 1448887_x_at  | <b>Fxc1</b>          | 246  | 301                    | 357  | 390                    | 367  | 574                    | 70                                                                          | B          |
| 1448232_x_at  | <b>Tuba6</b>         | 52   | 58                     | 67   | 77                     | 75   | 116                    | 71                                                                          | B          |
| 1417068_a_at  | <b>Ptpn1</b>         | 530  | 793                    | 735  | 984                    | 954  | 1480                   | 72                                                                          | B          |
| 1448239_at    | <b>Hmox1</b>         | 193  | 346                    | 320  | 463                    | 479  | 947                    | 73                                                                          | B          |
| 1417492_at    | <b>Ctsb</b>          | 184  | 264                    | 295  | 446                    | 423  | 679                    | 74                                                                          | B          |
| 1433741_at    | <b>Cd38</b>          | 301  | 416                    | 418  | 694                    | 641  | 1128                   | 75                                                                          | B          |
| 1450882_s_at  | <b>Tm7sf1</b>        | 153  | 185                    | 169  | 247                    | 223  | 320                    | 76                                                                          | B          |
| 1417490_at    | <b>Ctsb</b>          | 2895 | 3837                   | 3843 | 5228                   | 4489 | 6144                   | 77                                                                          | B          |
| 1423569_at    | <b>Gatm</b>          | 100  | 213                    | 311  | 553                    | 367  | 781                    | 78                                                                          | B          |
| 1425214_at    | <b>P2ry6</b>         | 168  | 259                    | 294  | 411                    | 308  | 505                    | 79                                                                          | B          |
| 1417483_at    | <b>Nfkbiz</b>        | 166  | 247                    | 314  | 411                    | 340  | 579                    | 80                                                                          | B          |
| 1450697_at    | <b>Slc30a7</b>       | 111  | 137                    | 157  | 188                    | 161  | 232                    | 81                                                                          | B          |
| 1417290_at    | <b>Lrg1</b>          | 674  | 1010                   | 778  | 1231                   | 1006 | 1780                   | 82                                                                          | B          |
| 1451715_at    | <b>Mafb</b>          | 15   | 37                     | 27   | 49                     | 38   | 89                     | 83                                                                          | B          |
| 1422062_at    | <b>Msr1</b>          | 70   | 341                    | 277  | 500                    | 337  | 860                    | 84                                                                          | B          |
| 1425434_a_at  | <b>Msr1</b>          | 45   | 156                    | 138  | 229                    | 163  | 399                    | 85                                                                          | B          |
| 1449976_a_at  | <b>Gpr35</b>         | 27   | 90                     | 81   | 120                    | 77   | 217                    | 86                                                                          | B          |
| 1417779_at    | <b>2310079N02Rik</b> | 81   | 121                    | 108  | 202                    | 140  | 294                    | 87                                                                          | B          |
| 1448883_at    | <b>Lgmn</b>          | 475  | 715                    | 619  | 1170                   | 723  | 1547                   | 88                                                                          | B          |
| 1435476_a_at  | <b>Fcgr2b</b>        | 204  | 550                    | 490  | 957                    | 595  | 1536                   | 89                                                                          | B          |
| 1451941_a_at  | <b>Fcgr2b</b>        | 103  | 479                    | 458  | 947                    | 577  | 1537                   | 90                                                                          | B          |
| 1435477_s_at  | <b>Fcgr2b</b>        | 250  | 1055                   | 797  | 1663                   | 1077 | 2562                   | 91                                                                          | B          |
| 1455332_x_at  | <b>Fcgr2b</b>        | 151  | 583                    | 484  | 968                    | 610  | 1517                   | 92                                                                          | B          |
| 1421009_at    | <b>Rsad2</b>         | 62   | 157                    | 149  | 159                    | 115  | 334                    | 93                                                                          | B          |
| 1421008_at    | <b>Rsad2</b>         | 49   | 119                    | 148  | 151                    | 113  | 274                    | 94                                                                          | B          |

| Probe set no. | Gene name            | 0    |                        | 25   |                        | 42   |                        | max-min <sub>50</sub> ,<br>max/min <sub>2</sub> ,<br>q geno 0.05<br>(order) | Subcluster |
|---------------|----------------------|------|------------------------|------|------------------------|------|------------------------|-----------------------------------------------------------------------------|------------|
|               |                      | FVB  | macIL-10 <sup>tg</sup> | FVB  | macIL-10 <sup>tg</sup> | FVB  | macIL-10 <sup>tg</sup> |                                                                             |            |
| 1436058_at    | <b>Rsad2</b>         | 196  | 459                    | 570  | 551                    | 435  | 1151                   | 95                                                                          | B          |
| 1419272_at    | <b>Myd88</b>         | 345  | 544                    | 444  | 587                    | 436  | 955                    | 96                                                                          | B          |
| 1416576_at    | <b>Socs3</b>         | 207  | 407                    | 380  | 622                    | 350  | 1323                   | 97                                                                          | B          |
| 1456212_x_at  | <b>Socs3</b>         | 182  | 409                    | 338  | 604                    | 373  | 1321                   | 98                                                                          | B          |
| 1455899_x_at  | <b>Socs3</b>         | 368  | 824                    | 751  | 1173                   | 847  | 2850                   | 99                                                                          | B          |
| 1449399_a_at  | <b>Il1b</b>          | 230  | 680                    | 621  | 764                    | 420  | 2448                   | 100                                                                         | B          |
| 1417262_at    | <b>Ptgs2</b>         | 181  | 168                    | 288  | 297                    | 249  | 681                    | 101                                                                         | B          |
| 1416563_at    | <b>Ctps</b>          | 389  | 372                    | 525  | 581                    | 466  | 978                    | 102                                                                         | B          |
| 1460227_at    | <b>Timp1</b>         | 80   | 113                    | 336  | 488                    | 189  | 1220                   | 103                                                                         | B          |
| 1419060_at    | <b>Gzmb</b>          | 57   | 152                    | 238  | 440                    | 200  | 1036                   | 104                                                                         | B          |
| 1449227_at    | <b>Ch25h</b>         | 79   | 100                    | 192  | 409                    | 205  | 1194                   | 105                                                                         | B          |
| 1451798_at    | <b>Il1rn</b>         | 57   | 97                     | 249  | 405                    | 272  | 1327                   | 106                                                                         | B          |
| 1427998_at    | <b>2600001B17Rik</b> | 48   | 56                     | 66   | 73                     | 69   | 120                    | 107                                                                         | B          |
| 1459992_x_at  | <b>Cln8</b>          | 102  | 111                    | 118  | 133                    | 128  | 208                    | 108                                                                         | B          |
| 1420380_at    | <b>Ccl2</b>          | 28   | 68                     | 399  | 598                    | 270  | 1194                   | 109                                                                         | B          |
| 1452408_at    | <b>LOC547214</b>     | 11   | 14                     | 57   | 84                     | 44   | 153                    | 110                                                                         | B          |
| 1422703_at    | <b>Gyk</b>           | 39   | 57                     | 85   | 120                    | 74   | 196                    | 111                                                                         | B          |
| 1422704_at    | <b>Gyk</b>           | 177  | 224                    | 316  | 482                    | 304  | 783                    | 112                                                                         | B          |
| 1438948_x_at  | <b>Bzrp</b>          | 1080 | 1295                   | 1490 | 1897                   | 1591 | 2732                   | 113                                                                         | B          |
| 1456251_x_at  | <b>Bzrp</b>          | 753  | 906                    | 1082 | 1394                   | 1135 | 2001                   | 114                                                                         | B          |
| 1417381_at    | <b>C1qa</b>          | 129  | 413                    | 1850 | 2323                   | 2607 | 3271                   | 115                                                                         | B          |
| 1417063_at    | <b>C1qb</b>          | 166  | 448                    | 1573 | 2095                   | 2334 | 3060                   | 116                                                                         | B          |
| 1437726_x_at  | <b>C1qb</b>          | 166  | 450                    | 1199 | 1757                   | 1874 | 2433                   | 117                                                                         | B          |
| 1449401_at    | <b>C1qg</b>          | 159  | 381                    | 1157 | 1745                   | 1680 | 2245                   | 118                                                                         | B          |
| 1419627_s_at  | <b>Clec4n</b>        | 461  | 700                    | 1118 | 1235                   | 1395 | 1820                   | 119                                                                         | B          |
| 1425951_a_at  | <b>Clec4n</b>        | 172  | 321                    | 605  | 687                    | 822  | 1041                   | 120                                                                         | B          |
| 1449930_a_at  | <b>Ssr2</b>          | 315  | 408                    | 544  | 571                    | 609  | 791                    | 121                                                                         | B          |
| 1417851_at    | <b>Cxcl13</b>        | 162  | 878                    | 1522 | 3677                   | 2392 | 3911                   | 122                                                                         | B          |
| 1448859_at    | <b>Cxcl13</b>        | 79   | 421                    | 812  | 2145                   | 1317 | 2257                   | 123                                                                         | B          |
| 1424754_at    | <b>Ms4a7</b>         | 74   | 231                    | 591  | 1096                   | 771  | 1120                   | 124                                                                         | B          |
| 1448732_at    | <b>Ctsb</b>          | 1005 | 1737                   | 2536 | 3572                   | 3226 | 4496                   | 125                                                                         | B          |
| 1460180_at    | <b>Hexb</b>          | 531  | 747                    | 1081 | 1508                   | 1225 | 1846                   | 126                                                                         | B          |

| Probe set no. | Gene name            | 0    |                        | 25   |                        | 42   |                        | max-min <sub>50</sub> ,<br>max/min <sub>2</sub> ,<br>q geno 0.05<br>(order) | Subcluster |
|---------------|----------------------|------|------------------------|------|------------------------|------|------------------------|-----------------------------------------------------------------------------|------------|
|               |                      | FVB  | macIL-10 <sup>tg</sup> | FVB  | macIL-10 <sup>tg</sup> | FVB  | macIL-10 <sup>tg</sup> |                                                                             |            |
| 1421228_at    | <b>Ccl7</b>          | 18   | 36                     | 147  | 309                    | 91   | 397                    | 127                                                                         | B          |
| 1448734_at    | <b>Cp</b>            | 453  | 453                    | 761  | 888                    | 489  | 936                    | 128                                                                         | B          |
| 1419508_at    | <b>Ripk1</b>         | 57   | 78                     | 100  | 100                    | 89   | 128                    | 129                                                                         | B          |
| 1432426_a_at  | <b>2510010F15Rik</b> | 126  | 174                    | 204  | 219                    | 189  | 258                    | 130                                                                         | B          |
| 1424041_s_at  | <b>C1s</b>           | 690  | 874                    | 1545 | 1787                   | 1256 | 2116                   | 131                                                                         | B          |
| 1429568_x_at  | <b>2510010F15Rik</b> | 242  | 296                    | 354  | 412                    | 325  | 485                    | 132                                                                         | B          |
| 1450826_a_at  | <b>Saa3</b>          | 99   | 2960                   | 4453 | 6979                   | 4341 | 8856                   | 133                                                                         | B          |
| 1422601_at    | <b>Serpinb9</b>      | 1041 | 982                    | 2247 | 2037                   | 1684 | 2702                   | 134                                                                         | B          |
| 1450783_at    | <b>Ifit1</b>         | 175  | 279                    | 663  | 541                    | 386  | 851                    | 135                                                                         | B          |
| 1418207_at    | <b>Fxyd4</b>         | 26   | 25                     | 31   | 33                     | 30   | 84                     | 136                                                                         | B          |
| 1435504_at    | <b>Rsnl2</b>         | 99   | 91                     | 115  | 147                    | 124  | 369                    | 137                                                                         | B          |
| 1417323_at    | <b>5430413I02Rik</b> | 23   | 27                     | 44   | 44                     | 50   | 234                    | 138                                                                         | B          |
| 1419083_at    | <b>Tnfsf11</b>       | 10   | 10                     | 13   | 18                     | 17   | 81                     | 139                                                                         | B          |
| 1425663_at    | <b>Il1rn</b>         | 31   | 39                     | 68   | 111                    | 79   | 584                    | 140                                                                         | B          |
| 1450297_at    | <b>Il6</b>           | 9    | 11                     | 25   | 28                     | 14   | 204                    | 141                                                                         | B          |
| 1426123_a_at  | <b>Rrbp1</b>         | 99   | 121                    | 112  | 116                    | 130  | 287                    | 142                                                                         | B          |
| 1437458_x_at  | <b>Clu</b>           | 1534 | 1321                   | 1366 | 1728                   | 1978 | 4587                   | 143                                                                         | B          |
| 1437689_x_at  | <b>Clu</b>           | 1455 | 1289                   | 1292 | 1706                   | 1978 | 4618                   | 144                                                                         | B          |
| 1424404_at    | <b>0610040J01Rik</b> | 108  | 102                    | 93   | 107                    | 85   | 224                    | 145                                                                         | B          |
| 1437277_x_at  | <b>Tgm2</b>          | 3574 | 3542                   | 3197 | 3573                   | 3180 | 6665                   | 146                                                                         | B          |
| 1418945_at    | <b>Mmp3</b>          | 63   | 67                     | 64   | 107                    | 57   | 525                    | 147                                                                         | B          |
| 1455900_x_at  | <b>Tgm2</b>          | 1353 | 1352                   | 1322 | 1459                   | 1357 | 3217                   | 148                                                                         | B          |
| 1433428_x_at  | <b>Tgm2</b>          | 2538 | 2400                   | 2370 | 2584                   | 2324 | 5148                   | 149                                                                         | B          |
| 1450971_at    | <b>Gadd45b</b>       | 503  | 421                    | 431  | 385                    | 460  | 809                    | 150                                                                         | B          |
| 1420498_a_at  | <b>Dab2</b>          | 586  | 754                    | 364  | 805                    | 344  | 934                    | 151                                                                         | B          |
| 1419610_at    | <b>Ccr1</b>          | 17   | 51                     | 16   | 36                     | 15   | 66                     | 152                                                                         | B          |
| 1419609_at    | <b>Ccr1</b>          | 159  | 527                    | 173  | 539                    | 204  | 896                    | 153                                                                         | B          |
| 1434484_at    | <b>1100001G20Rik</b> | 183  | 454                    | 280  | 539                    | 212  | 763                    | 154                                                                         | B          |
| 1427102_at    | <b>Slfn4</b>         | 41   | 322                    | 89   | 127                    | 57   | 834                    | 155                                                                         | B          |
| 1430826_s_at  | <b>Gcnt2</b>         | 50   | 74                     | 48   | 66                     | 47   | 137                    | 156                                                                         | B          |
| 1423632_at    | <b>Gpr146</b>        | 84   | 112                    | 89   | 111                    | 68   | 157                    | 157                                                                         | B          |
| 1449027_at    | <b>Rhou</b>          | 139  | 159                    | 127  | 160                    | 101  | 215                    | 158                                                                         | B          |

| Probe set no. | Gene name            | 0    |                        | 25   |                        | 42   |                        | max-min <sub>50</sub> ,<br>max/min <sub>2</sub> ,<br>q geno 0.05<br>(order) | Subcluster |
|---------------|----------------------|------|------------------------|------|------------------------|------|------------------------|-----------------------------------------------------------------------------|------------|
|               |                      | FVB  | macIL-10 <sup>tg</sup> | FVB  | macIL-10 <sup>tg</sup> | FVB  | macIL-10 <sup>tg</sup> |                                                                             |            |
| 1448894_at    | <b>Akr1b8</b>        | 399  | 470                    | 344  | 377                    | 263  | 636                    | 159                                                                         | B          |
| 1455959_s_at  | <b>Gclc</b>          | 808  | 996                    | 723  | 806                    | 544  | 1263                   | 160                                                                         | B          |
| 1449015_at    | <b>Retnla</b>        | 766  | 1114                   | 1000 | 1844                   | 505  | 3046                   | 161                                                                         | B          |
| 1451796_s_at  | <b>Hdc</b>           | 564  | 570                    | 547  | 633                    | 423  | 943                    | 162                                                                         | B          |
| 1454713_s_at  | <b>Hdc</b>           | 680  | 590                    | 561  | 659                    | 447  | 1064                   | 163                                                                         | B          |
| 1422089_at    | <b>Ncr1</b>          | 59   | 45                     | 105  | 38                     | 89   | 36                     | 164                                                                         | C          |
| 1425243_at    | <b>Cd207</b>         | 77   | 68                     | 105  | 49                     | 93   | 24                     | 165                                                                         | C          |
| 1415904_at    | <b>Lpl</b>           | 2355 | 1688                   | 2170 | 2058                   | 1788 | 463                    | 166                                                                         | C          |
| 1431056_a_at  | <b>Lpl</b>           | 599  | 451                    | 665  | 627                    | 492  | 116                    | 167                                                                         | C          |
| 1453836_a_at  | <b>Mgll</b>          | 273  | 231                    | 254  | 270                    | 306  | 104                    | 168                                                                         | C          |
| 1419413_at    | <b>Ccl17</b>         | 72   | 22                     | 32   | 20                     | 30   | 21                     | 169                                                                         | C          |
| 1427352_at    | <b>BC031593</b>      | 410  | 184                    | 313  | 67                     | 255  | 26                     | 170                                                                         | C          |
| 1418086_at    | <b>Ppp1r14a</b>      | 328  | 175                    | 233  | 216                    | 185  | 103                    | 171                                                                         | C          |
| 1424543_at    | <b>Nck1</b>          | 81   | 63                     | 55   | 52                     | 57   | 31                     | 172                                                                         | C          |
| 1426785_s_at  | <b>Mgll</b>          | 871  | 594                    | 539  | 531                    | 594  | 218                    | 173                                                                         | C          |
| 1450391_a_at  | <b>Mgll</b>          | 566  | 402                    | 370  | 353                    | 412  | 154                    | 174                                                                         | C          |
| 1455918_at    | ---                  | 124  | 76                     | 65   | 83                     | 60   | 20                     | 175                                                                         | C          |
| 1416536_at    | <b>Mum1</b>          | 312  | 247                    | 197  | 180                    | 222  | 155                    | 176                                                                         | C          |
| 1455021_at    | <b>Gabbr1</b>        | 163  | 140                    | 107  | 94                     | 120  | 77                     | 177                                                                         | C          |
| 1426539_at    | <b>Usp11</b>         | 95   | 74                     | 63   | 50                     | 74   | 42                     | 178                                                                         | C          |
| 1427322_at    | <b>Brwd1</b>         | 217  | 200                    | 110  | 101                    | 122  | 62                     | 179                                                                         | C          |
| 1428467_at    | <b>Tardbp</b>        | 419  | 369                    | 223  | 231                    | 272  | 141                    | 180                                                                         | C          |
| 1426640_s_at  | <b>Trib2</b>         | 906  | 776                    | 381  | 470                    | 469  | 332                    | 181                                                                         | C          |
| 1421791_at    | <b>Ang3</b>          | 624  | 482                    | 92   | 58                     | 79   | 18                     | 182                                                                         | C          |
| 1452222_at    | <b>Utrn</b>          | 1638 | 1282                   | 696  | 688                    | 614  | 425                    | 183                                                                         | C          |
| 1424540_at    | <b>Hipk1</b>         | 1481 | 1348                   | 921  | 869                    | 903  | 736                    | 184                                                                         | C          |
| 1455073_at    | <b>Cdadc1</b>        | 194  | 176                    | 83   | 88                     | 84   | 52                     | 185                                                                         | C          |
| 1418926_at    | <b>Zfhx1a</b>        | 1015 | 787                    | 628  | 593                    | 507  | 319                    | 186                                                                         | C          |
| 1448842_at    | <b>Cdo1</b>          | 1602 | 1280                   | 909  | 889                    | 720  | 393                    | 187                                                                         | C          |
| 1427066_a_at  | <b>4933439F18Rik</b> | 256  | 198                    | 141  | 146                    | 130  | 89                     | 188                                                                         | C          |
| 1420851_at    | <b>Pard6g</b>        | 551  | 489                    | 342  | 320                    | 283  | 211                    | 189                                                                         | C          |
| 1433476_at    | <b>C78339</b>        | 1442 | 1346                   | 985  | 934                    | 869  | 703                    | 190                                                                         | C          |

| Probe set no. | Gene name                                               | 0    |                        | 25   |                        | 42   |                        | max-min <sub>50</sub> ,<br>max/min <sub>2</sub> ,<br>q geno 0.05<br>(order) | Subcluster |
|---------------|---------------------------------------------------------|------|------------------------|------|------------------------|------|------------------------|-----------------------------------------------------------------------------|------------|
|               |                                                         | FVB  | macIL-10 <sup>tg</sup> | FVB  | macIL-10 <sup>tg</sup> | FVB  | macIL-10 <sup>tg</sup> |                                                                             |            |
| 1421870_at    | <b>Trim44</b>                                           | 1056 | 908                    | 674  | 608                    | 612  | 455                    | 191                                                                         | C          |
| 1438006_at    | <b>4933439F18Rik</b>                                    | 354  | 304                    | 188  | 186                    | 171  | 106                    | 192                                                                         | C          |
| 1452217_at    | <b>Ahnak</b>                                            | 5398 | 4748                   | 2950 | 3050                   | 2088 | 1448                   | 193                                                                         | C          |
| 1428230_at    | <b>Prkcn</b>                                            | 609  | 556                    | 440  | 436                    | 358  | 230                    | 194                                                                         | C          |
| 1448236_at    | <b>Rdx</b>                                              | 1777 | 1556                   | 1254 | 1265                   | 982  | 763                    | 195                                                                         | C          |
| 1451469_at    | <b>B430108F07Rik</b>                                    | 91   | 76                     | 69   | 63                     | 52   | 39                     | 196                                                                         | C          |
| 1452812_at    | <b>Lphn1</b>                                            | 115  | 95                     | 86   | 80                     | 74   | 57                     | 197                                                                         | C          |
| 1426518_at    | <b>Tubgcp5</b>                                          | 164  | 157                    | 126  | 127                    | 126  | 78                     | 198                                                                         | C          |
| 1448361_at    | <b>Ttc3</b>                                             | 549  | 518                    | 431  | 400                    | 399  | 272                    | 199                                                                         | C          |
| 1454636_at    | <b>Cbx5</b>                                             | 396  | 345                    | 305  | 296                    | 287  | 193                    | 200                                                                         | C          |
| 1456430_at    | <b>D3Ertd789e</b>                                       | 160  | 169                    | 130  | 120                    | 122  | 63                     | 201                                                                         | C          |
| 1421653_a_at  | <b>Igh-VJ558/LOC238447/LOC544903/ LOC544907</b>         | 1033 | 535                    | 2913 | 401                    | 8534 | 7636                   | 202                                                                         | D          |
| 1425763_x_at  | <b>Igh-VJ558/LOC238447/LOC544903/ LOC544907</b>         | 970  | 545                    | 2835 | 425                    | 8216 | 7437                   | 203                                                                         | D          |
| 1429381_x_at  | <b>Igh-VJ558/LOC238447/LOC544903/ LOC544907</b>         | 659  | 359                    | 2018 | 281                    | 6796 | 5780                   | 204                                                                         | D          |
| 1427455_x_at  | <b>Igk-C/Igk-V28/LOC243469/LOC545854</b>                | 2570 | 916                    | 3663 | 3045                   | 9660 | 7861                   | 205                                                                         | D          |
| 1452417_x_at  | <b>Igk-C/Igk-V28/2010205A11Rik/ LOC243469/LOC545854</b> | 2259 | 1341                   | 2829 | 2905                   | 5026 | 4170                   | 206                                                                         | D          |
| 1418987_at    | <b>Pla2g2d</b>                                          | 57   | 23                     | 98   | 73                     | 317  | 53                     | 207                                                                         | D          |
| 1451632_a_at  | <b>Igh-1a</b>                                           | 84   | 7                      | 39   | 15                     | 2175 | 60                     | 208                                                                         | D          |
| 1448229_s_at  | <b>Ccnd2</b>                                            | 45   | 52                     | 51   | 34                     | 118  | 66                     | 209                                                                         | D          |
| 1417925_at    | <b>Ccl22</b>                                            | 47   | 29                     | 61   | 33                     | 91   | 34                     | 210                                                                         | D          |
| 1423586_at    | <b>Axl</b>                                              | 341  | 321                    | 638  | 407                    | 733  | 328                    | 211                                                                         | D          |
| 1455618_x_at  | <b>1300010A20Rik</b>                                    | 54   | 56                     | 121  | 71                     | 135  | 71                     | 212                                                                         | D          |
| 1423466_at    | <b>Ccr7</b>                                             | 36   | 32                     | 127  | 91                     | 221  | 72                     | 213                                                                         | D          |

| Probe set no. | Gene name            | 0   |                        | 25  |                        | 42  |                        | max-min <sub>50</sub> ,<br>max/min <sub>2</sub> ,<br>q geno 0.05<br>(order) | Subcluster |
|---------------|----------------------|-----|------------------------|-----|------------------------|-----|------------------------|-----------------------------------------------------------------------------|------------|
|               |                      | FVB | macIL-10 <sup>tg</sup> | FVB | macIL-10 <sup>tg</sup> | FVB | macIL-10 <sup>tg</sup> |                                                                             |            |
| 1424032_at    | <b>0610039P13Rik</b> | 146 | 147                    | 432 | 338                    | 701 | 358                    | 214                                                                         | D          |
| 1456870_at    | <b>A430107D22Rik</b> | 16  | 17                     | 57  | 42                     | 92  | 43                     | 215                                                                         | D          |
| 1450020_at    | <b>Cx3cr1</b>        | 77  | 57                     | 101 | 82                     | 176 | 98                     | 216                                                                         | D          |
| 1426379_at    | <b>Eif4b</b>         | 214 | 247                    | 358 | 295                    | 430 | 325                    | 217                                                                         | D          |
| 1449130_at    | <b>Cd1d1</b>         | 152 | 128                    | 388 | 256                    | 451 | 268                    | 218                                                                         | D          |
| 1449131_s_at  | <b>Cd1d1</b>         | 214 | 178                    | 557 | 382                    | 614 | 363                    | 219                                                                         | D          |

<sup>a</sup> Average values of RMA-normalized signal intensities
